# Supplementary material for: Hydration of alkynes at room temperature catalyzed by gold(i) isocyanide compounds
Source: Royal Society of Chemistry journal article supplement (doi:10.1039/c4gc01322k), 2014-09-18
Supplement: c4gc01322k1.pdf [file c4gc01322k1.pdf]

## Supplementary Information for:

# Hydration of alkynes at room temperature catalyzed by gold (I) isocyanide compounds

*Yun Xu*<sup>a, b</sup>, *Xingbang Hu*<sup>a, \*</sup>, *Jing Shao*<sup>a</sup>, *Guoqiang Yang*<sup>a</sup>, *Youting Wu*<sup>a, \*</sup>, *Zhibing Zhang*<sup>a</sup>

<sup>a</sup> *School of Chemistry and Chemical Engineering, Nanjing University, Nanjing  
210093, PR China*

<sup>b</sup> *China Pharmaceutical University, Nanjing, 211198, PR China*

\*Corresponding authors; E-mail Address: [huxb@nju.edu.cn](mailto:huxb@nju.edu.cn); [ytwu@nju.edu.cn](mailto:ytwu@nju.edu.cn); Fax:  
+86 2583 336599; Tel: +86 2583 596665

### List of Contents:

1. Experimental
  - 1.1 Materials and methods
  - 1.2 Synthetic procedures of catalyst
2. General procedures for hydration reactions
3. The <sup>13</sup>C NMR, <sup>1</sup>H NMR and MS data of the products
4. Table S1 Hydration of various alkynes catalyzed by Cat-2
5. Computational methods
6. Cartesians coordinates of the optimized structures

## 1. Experimental

### 1.1 Materials and methods

All solvents and chemicals were commercially available and used without further purification unless otherwise stated.

$^1\text{H}$  NMR spectra were determined on a Bruker DPX 300 MHz spectrometer, using  $\text{CDCl}_3$  as solvents with TMS as the internal standard. Elemental analysis was taken on an Elementar vario EL II. The purity of raw materials and the reaction solution was analyzed using a GC5890C gas chromatography fitted with a SE-50 column (50 m, 0.25 mm diameters) and a flame ionisation detector. The structure and content of the product and byproducts were further identified using a HP6890 GC/MS spectrometer by comparing retention times and fragmentation patterns with authentic samples.

### 1.2 Synthetic Procedures

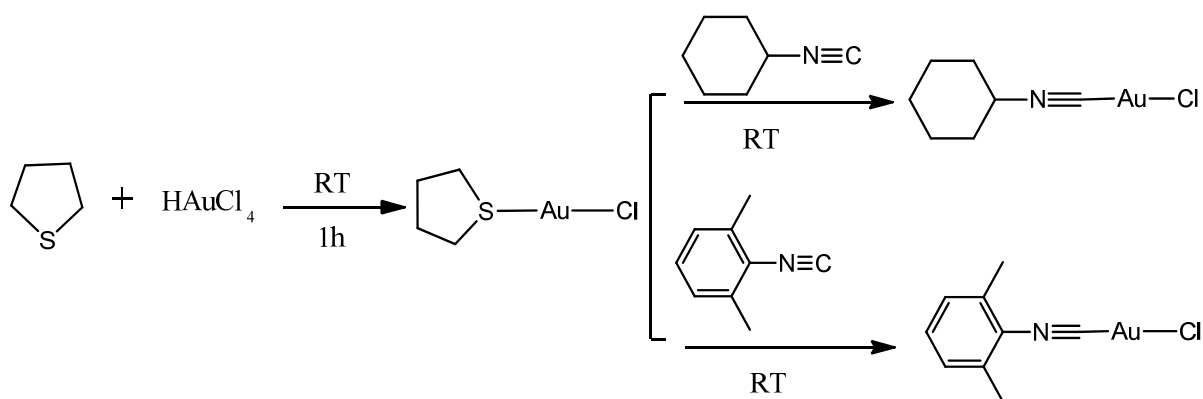

(A) Preparation of  $(\text{tht})\text{AuCl}$ :  $\text{H[AuCl}_4\cdot 4\text{H}_2\text{O}]$  (1g, 2.4mmol) was dissolved in  $\text{H}_2\text{O}/\text{C}_2\text{H}_5\text{OH}$  (20ml, 4:1) and excessive amounts of tetrahydrothiophene were added slowly dropwise under stirring. The yellow solution became displayed white turbidity.  $(\text{tht})$

AuCl was filtered off and dried in thermostatic vacuum drier. (tht) AuCl was obtained as a colourless powder (Yield: 65%).

(B) Preparation of (CyNC)AuCl and (2,6-Me<sub>2</sub>C<sub>6</sub>H<sub>3</sub>NC)AuCl: (tht) AuCl (0.5g,1.5mmol) was dissolved in THF (20ml), then a solution of cyclohexyl isonitrile (0.2g,1.8mmol) or 2,6-dimethyphenyl isocyanide (0.2g,1.5mmol) in THF was added. The reaction mixture was stirred for 12h at ambient temperature. The solvent was removed and the resulting precipitate was recrystallized with THF/light petroleum (1:10) (Yield: 55%, 67%).

**Cat-1:** <sup>1</sup>H NMR (300 MHz, CDCl<sub>3</sub>): δ = 1.45-1.57 (m, 4H), 1.75-1.84 (m, 4H), 1.99-2.05 (m, 2H), 3.88-3.94 (m, 1H); <sup>13</sup>C NMR (75 MHz, CDCl<sub>3</sub>): δ = 22.6, 24.5, 31.5, 54.9; Elemental analysis of C<sub>7</sub>H<sub>11</sub>AuCIN: Calc. C 24.61, H 3.25, N 4.10; Found C 24.99, H 3.41, N 4.10. MS (m/z): [M+NH<sub>4</sub>]<sup>+</sup> calcd for [C<sub>7</sub>H<sub>11</sub>AuCIN+NH<sub>4</sub>]<sup>+</sup>, 359.06; found, 359.10.

**Cat-2:** <sup>1</sup>H NMR (300 MHz, CDCl<sub>3</sub>) δ = 2.47 (s, 6H), 7.18-7.20(d, 2H), 7.34-7.39(t, 1H); <sup>13</sup>C NMR (75 MHz, CDCl<sub>3</sub>) δ = 18.7, 128.5, 131, 136.2, 144.9; Elemental analysis of C<sub>9</sub>H<sub>9</sub>AuCIN: Calc. C 29.73, H 2.49, N 3.85; Found C 29.84, H 2.71, N 3.74. MS (m/z): [M+NH<sub>4</sub>]<sup>+</sup> calcd for [C<sub>9</sub>H<sub>9</sub>AuCIN+NH<sub>4</sub>]<sup>+</sup>, 381.04; found, 381.05.

All NMR data are in accordance with previous reports.<sup>31, 34, 38</sup>

## 2. General Procedures for Hydration Reactions

Akynes (1.0 mmol), methanol (1.0 ml), H<sub>2</sub>O (1.0 ml), Cat-1 or Cat-2 (0.05mmol) and KB(C<sub>6</sub>F<sub>5</sub>)<sub>4</sub> (0.05mmol) were added to a 10ml screw-cap vial. The reaction mixture was stirred at room temperature for 24h. The product was isolated by extraction using ether (Note: for large practical application, separation by distillation is a more green choice),

followed by removing the solvent under reduced pressure at room temperature. Catalyst can be further separated by flash chromatography on silica gel (eluent: ether).

### 3. The $^{13}\text{C}$ NMR, $^1\text{H}$ NMR and MS data of the products

**1b:**  $^{13}\text{C}$  NMR (75 MHz,  $\text{CDCl}_3$ )  $\delta$  197.71, 136.95, 132.93, 128.43, 128.14, 26.34;  $^1\text{H}$  NMR (300 MHz,  $\text{CDCl}_3$ )  $\delta$  7.89 – 7.87 (d, 2H), 7.50 – 7.45 (t, 1H), 7.39 – 7.34 (t, 2H), 2.50 (s, 3H); MS calculated m/e for  $\text{C}_8\text{H}_8\text{O}$ : 120.1, found: 120.1 (Relative abundance: 30%). Calculated [M- $\text{CH}_3$ ]: 105.1, found: 105.0 (Relative abundance: 100%)

**2b:**  $^{13}\text{C}$  NMR (75 MHz,  $\text{CDCl}_3$ )  $\delta$  198.07, 143.96, 134.93, 128.46, 128.06, 26.52, 21.62;  $^1\text{H}$  NMR (300 MHz,  $\text{CDCl}_3$ )  $\delta$  7.87 – 7.84 (d, 2H), 7.27 – 7.24 (d, 2H), 2.58 (s, 3H), 2.41 (s, 3H). MS calculated m/e for  $\text{C}_9\text{H}_{10}\text{O}$ : 134.1, found: 134.1 (Relative abundance: 32%). Calculated [M- $\text{CH}_3$ ]: 119.1, found: 119.0 (Relative abundance: 100%)

**3b:** MS calculated m/e for  $\text{C}_9\text{H}_{10}\text{O}$ : 134.1, found: 134.2 (Relative abundance: 25%). Calculated [M- $\text{COCH}_3$ ]: 91.1, found: 91.2 (Relative abundance: 100%)

**4b:** MS calculated m/e for  $\text{C}_{10}\text{H}_{12}\text{O}$ : 148.1, found: 148.0 (Relative abundance: 24%). Calculated [M- $\text{CH}_3$ ]: 133.1, found: 132.9 (Relative abundance: 100%)

**5b:**  $^{13}\text{C}$  NMR (75 MHz,  $\text{CDCl}_3$ )  $\delta$  197.28, 163.65, 130.64, 130.13, 113.71, 55.42, 26.24;  $^1\text{H}$  NMR (300 MHz,  $\text{CDCl}_3$ )  $\delta$  7.92 – 7.89 (d, 2H), 6.91 – 6.88 (d, 2H), 3.83 (s, 3H), 2.53 (s, 3H). MS calculated m/e for  $\text{C}_9\text{H}_{10}\text{O}_2$ : 150.1, found: 150.1 (Relative abundance: 29%). Calculated [M- $\text{CH}_3$ ]: 135.1, found: 135.0 (Relative abundance: 100%)

**6b:** MS calculated m/e for  $\text{C}_8\text{H}_7\text{ClO}$ : 154.0, found: 154.0 (Relative abundance: 32%). Calculated [M- $\text{CH}_3$ ]: 139.0, found: 139.0 (Relative abundance: 100%)

**7b:** MS calculated m/e for C<sub>9</sub>H<sub>7</sub>F<sub>3</sub>O: 188.0, found: 188.2 (Relative abundance: 10%).  
Calculated [M-CH<sub>3</sub>]: 173.0, found: 173.1 (Relative abundance: 100%)

**8b:** <sup>13</sup>C NMR (75 MHz, CDCl<sub>3</sub>) δ 200.47, 159.01, 133.99, 130.34, 127.93, 120.54, 111.72, 55.49, 31.73. <sup>1</sup>H NMR (300 MHz, CDCl<sub>3</sub>) δ 7.73 – 7.70 (d, 1H), 7.49 – 7.43 (t, 1H), 7.00 – 6.95 (t, 2H), 3.89 (s, 3H), 2.61 (s, 3H). MS calculated m/e for C<sub>9</sub>H<sub>10</sub>O<sub>2</sub>: 150.1, found: 150.4 (Relative abundance: 10%). Calculated [M-CH<sub>3</sub>]: 135.1, found: 135.3 (Relative abundance: 100%)

**9b:** <sup>13</sup>C NMR (75 MHz, CDCl<sub>3</sub>) δ 214.57, 51.52, 28.41, 27.87, 25.75, 25.51. <sup>1</sup>H NMR (300 MHz, CDCl<sub>3</sub>) δ 2.37-2.31 (br, 1H), 2.13 (s, 3H), 1.86 – 1.65 (m, 4H), 1.35 – 1.17 (m, 6H). MS calculated m/e for C<sub>8</sub>H<sub>14</sub>O: 126.1, found: 126.1 (Relative abundance: 21%).  
Calculated [M-CH<sub>3</sub>]: 111.1, found: 111.1 (Relative abundance: 8%)

**10b:** <sup>13</sup>C NMR (75 MHz, CDCl<sub>3</sub>) δ 199.81, 141.55, 139.49, 26.07, 25.02, 22.88, 21.83, 21.42. <sup>1</sup>H NMR (300 MHz, CDCl<sub>3</sub>) δ 6.90 – 6.87 (t, 1H), 2.22 (s, 3H), 2.20 – 2.15 (m, 4H), 1.58 – 1.53 (m, 4H). MS calculated m/e for C<sub>8</sub>H<sub>12</sub>O: 124.1, found: 124.1 (Relative abundance: 68%). Calculated [M-CH<sub>3</sub>]: 109.1, found: 109.1 (Relative abundance: 100%)

**11b:** MS calculated m/e for C<sub>5</sub>H<sub>9</sub>ClO: 120.0, found: 120.3 (Relative abundance: 20%).  
Calculated [M-CH<sub>3</sub>]: 105.0, found: 105.3 (Relative abundance: 26%)

**12b:** <sup>13</sup>C NMR (75 MHz, CDCl<sub>3</sub>) δ 210.06, 44.62, 42.68, 31.73, 29.85, 20.95. <sup>1</sup>H NMR (300 MHz, CDCl<sub>3</sub>) δ 3.52 – 3.48 (t, 2H), 2.50 – 2.45 (t, 2H), 2.14 (s, 3H), 1.74 – 1.68 (m, 4H).

**13b:** <sup>13</sup>C NMR (75 MHz, CDCl<sub>3</sub>) δ 208.31, 43.22, 29.31, 25.61, 21.95, 13.66. <sup>1</sup>H NMR (300 MHz, CDCl<sub>3</sub>) δ 2.35 – 2.30 (t, 2H), 2.03 (s, 3H), 1.50 – 1.40 (m, 2H), 1.27 – 1.15 (m,

2H), 0.83 – 0.78 (t, 3H). MS calculated m/e for C<sub>6</sub>H<sub>12</sub>O: 100.1, found: 100.1 (Relative abundance: 15%). Calculated [M-CH<sub>3</sub>]: 85.1, found: 85.1 (Relative abundance: 11%). Calculated [M-C<sub>4</sub>H<sub>9</sub>]: 43.0, found: 43.1 (Relative abundance: 100%)

**14b:** <sup>13</sup>C NMR (75 MHz, CDCl<sub>3</sub>) δ 207.92, 43.44, 31.33, 29.22, 28.73, 23.43, 22.17, 13.94. <sup>1</sup>H NMR (300 MHz, CDCl<sub>3</sub>) δ 2.34 – 2.29 (t, 2H), 2.02 (s, 3H), 1.48 – 1.41 (m, 2H), 1.18 (br, 6H), 0.80 – 0.75 (t, 3H). MS calculated m/e for C<sub>8</sub>H<sub>16</sub>O: 128.1, found: 128.1 (Relative abundance: 8%). Calculated [M-CH<sub>3</sub>]: 113.1, found: 113.1 (Relative abundance: 4%). Calculated [M-C<sub>6</sub>H<sub>13</sub>]: 43.0, found: 43.0 (Relative abundance: 100%)

**15b:** <sup>13</sup>C NMR (75 MHz, CDCl<sub>3</sub>) δ 210.03, 43.67, 31.73, 29.60, 29.28, 29.07, 29.05, 23.78, 22.54, 13.92. <sup>1</sup>H NMR (300 MHz, CDCl<sub>3</sub>) δ 2.38 – 2.33 (t, 2H), 2.06 (s, 3H), 1.51 – 1.47 (m, 2H), 1.20 (br, 10H), 0.83 – 0.78 (t, 3H). MS calculated m/e for C<sub>10</sub>H<sub>20</sub>O: 156.2, found: 156.2 (Relative abundance: 6%). Calculated [M-CH<sub>3</sub>]: 141.1, found: 141.2 (Relative abundance: 3%).

**16b:** <sup>13</sup>C NMR (75 MHz, CDCl<sub>3</sub>) δ 209.92, 42.38, 29.79, 17.49. <sup>1</sup>H NMR (300 MHz, CDCl<sub>3</sub>) δ 2.47 – 2.42 (t, 4H), 2.10 (s, 6H), 1.81 – 1.71 (m, 2H). MS calculated m/e for C<sub>7</sub>H<sub>12</sub>O<sub>2</sub>: 128.1, found: 128.4 (Relative abundance: 7%). Calculated [M-CH<sub>3</sub>]: 113.1, found: 113.3 (Relative abundance: 5%).

**17b:** <sup>13</sup>C NMR (75 MHz, CDCl<sub>3</sub>) δ 209.87, 43.20, 29.76, 22.95. <sup>1</sup>H NMR (300 MHz, CDCl<sub>3</sub>) δ 2.40 (br, 4H), 2.07 (s, 6H), 1.51– 1.44 (m, 4H).

4. Table S1 Hydration of various alkynes catalyzed by Cat-2 <sup>a</sup>

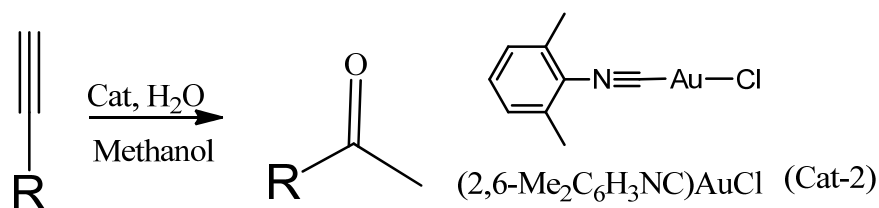

| Entry | Reactant | Product | Yield (%) <sup>b</sup> |
|-------|----------|---------|------------------------|
| 1     | 2a       | 2b      | 99                     |
| 2     | 4a       | 4b      | >99 (95)               |
| 3     | 5a       | 5b      | 97                     |
| 4     | 11a      | 11b     | >99 (96)               |
| 5     | 12a      | 12b     | 96                     |

<sup>a</sup> Reaction condition: alkyne (1.0 mmol), Cat-2 (0.05mmol), KB(C<sub>6</sub>F<sub>5</sub>)<sub>4</sub> (0.05mmol), H<sub>2</sub>O(1.0 ml), methanol (1.0 ml), room temperature, 24h. <sup>b</sup> Yield determined by GC with biphenyl as internal standard. Isolated yields are shown in parenthesis

## 5. Computational Methods:

All the geometries were fully optimized with Gaussian 03 program using B3LYP method based on density functional theory<sup>S1</sup>. LANL2DZ basis set was used for Au and 6-31+G\* basis set for other atoms. Energy calculations as well as Zero-point energies (ZPE) correction have been performed at the same theory. All energies reported in this work are corrected by ZPE. The computed stationary points have been characterized as minima or transition states by diagonalizing the Hessian matrix and analyzing the vibrational normal modes. In this way, the stationary points can be classified as minima if no imaginary frequencies are shown or as transition states if only one imaginary frequency is obtained.

The particular nature of the transition states has been determined by analyzing the motion described by the eigenvector associated with the imaginary frequency.

#### Reference:

(S1) Frisch, M. J.; Trucks, G. W.; Schlegel, H. B.; Scuseria, G. E.; Robb, M. A.; Cheeseman, J. R.; Montgomery, Jr., J. A.; Vreven, T.; Kudin, K. N.; Burant, J. C.; Millam, J. M.; Iyengar, S. S.; Tomasi, J.; Barone, V.; Mennucci, B.; Cossi, M.; Scalmani, G.; Rega, N.; Petersson, G. A.; Nakatsuji, H.; Hada, M.; Ehara, M.; Toyota, K.; Fukuda, R.; Hasegawa, J.; Ishida, M.; Nakajima, T.; Honda, Y.; Kitao, O.; Nakai, H.; Klene, M.; Li, X.; Knox, J. E.; Hratchian, H. P.; Cross, J. B.; Adamo, C.; Jaramillo, J.; Gomperts, R.; Stratmann, R. E.; Yazyev, O.; Austin, A. J.; Cammi, R.; Pomelli, C.; Ochterski, J. W.; Ayala, P. Y.; Morokuma, K.; Voth, G. A.; Salvador, P.; Dannenberg, J. J.; Zakrzewski, V. G.; Dapprich, S.; Daniels, A. D.; Strain, M. C.; Farkas, O.; Malick, D. K.; Rabuck, A. D.; Raghavachari, K.; Foresman, J. B.; Ortiz, J. V.; Cui, Q.; Baboul, A. G.; Clifford, S.; Cioslowski, J.; Stefanov, B. B.; Liu, G.; Liashenko, A.; Piskorz, P.; Komaromi, I.; Martin, R. L.; Fox, D. J.; Keith, T.; Al-Laham, M. A.; Peng, C. Y.; Nanayakkara, A.; Challacombe, M.; Gill, P. M. W.; Johnson, B.; Chen, W.; Wong, M. W.; Gonzalez, C.; and Pople, J. A.; Gaussian, Inc., Pittsburgh PA, **2003**.

#### **6. Cartesians coordinates of the optimized structures**

Cat-1<sup>+</sup>

|     |           |          |           |
|-----|-----------|----------|-----------|
| C 0 | 1.132858  | 0.930649 | -0.585648 |
| C 0 | 1.132858  | 2.469803 | -0.585648 |
| C 0 | -0.322464 | 0.418488 | -0.585648 |
| C 0 | 0.319595  | 3.040268 | 0.586243  |
| C 0 | -1.142029 | 0.954956 | 0.606308  |



|      |           |           |           |
|------|-----------|-----------|-----------|
| C 0  | -1.116211 | 2.493805  | 0.592819  |
| N 0  | -0.330780 | -1.033035 | -0.571960 |
| C 0  | -0.323608 | -2.187881 | -0.535767 |
| Au 0 | -0.314407 | -4.134277 | -0.479477 |
| H 0  | 1.639800  | 0.553894  | 0.312454  |
| H 0  | 1.666200  | 0.539520  | -1.459412 |
| H 0  | 0.721100  | 2.834396  | -1.537598 |
| H 0  | 2.170425  | 2.819168  | -0.542496 |
| H 0  | -0.813492 | 0.691071  | -1.528366 |
| H 0  | 0.301254  | 4.134262  | 0.528931  |
| H 0  | 0.813873  | 2.784866  | 1.534714  |
| H 0  | -0.698471 | 0.578857  | 1.537613  |
| H 0  | -2.170441 | 0.580536  | 0.550827  |
| H 0  | -1.658432 | 2.859818  | -0.290771 |
| H 0  | -1.665283 | 2.860107  | 1.467377  |

Rea

|      |           |           |           |
|------|-----------|-----------|-----------|
| C 0  | 0.102615  | 3.382263  | -2.026169 |
| C 0  | 0.102615  | 4.920349  | -2.026169 |
| C 0  | -1.347748 | 2.859131  | -2.026169 |
| C 0  | -0.711960 | 5.490555  | -0.854538 |
| C 0  | -2.166763 | 3.401550  | -0.837723 |
| C 0  | -2.146347 | 4.939606  | -0.847488 |
| N 0  | -1.351730 | 1.414597  | -2.013657 |
| C 0  | -1.347687 | 0.255295  | -1.996170 |
| Au 0 | -1.362350 | -1.736862 | -2.007797 |
| C 0  | 1.570343  | -6.123398 | 1.752167  |
| C 0  | 0.222107  | -5.832397 | 2.009796  |
| C 0  | -0.558212 | -5.244583 | 1.024048  |
| C 0  | 0.017227  | -4.943008 | -0.240326 |
| C 0  | 1.384521  | -5.242096 | -0.488876 |
| C 0  | 2.149994  | -5.829803 | 0.508514  |
| C 0  | -0.771530 | -4.390121 | -1.251663 |
| C 0  | -1.468155 | -3.837723 | -2.143646 |
| H 0  | 0.612366  | 3.005081  | -1.129456 |
| H 0  | 0.637833  | 2.991028  | -2.898987 |
| H 0  | -0.312347 | 5.284668  | -2.977127 |
| H 0  | 1.138626  | 5.275467  | -1.984009 |
| H 0  | -1.837875 | 3.140717  | -2.967087 |
| H 0  | -0.732086 | 6.584961  | -0.910980 |
| H 0  | -0.217010 | 5.234833  | 0.093781  |
| H 0  | -1.725616 | 3.024689  | 0.094803  |
| H 0  | -3.194183 | 3.023712  | -0.892395 |
| H 0  | -2.687302 | 5.306000  | -1.731995 |

|     |           |           |           |
|-----|-----------|-----------|-----------|
| H 0 | -2.696182 | 5.307266  | 0.026382  |
| H 0 | 2.175095  | -6.584961 | 2.527939  |
| H 0 | -0.210205 | -6.068588 | 2.977142  |
| H 0 | -1.604218 | -5.015106 | 1.201752  |
| H 0 | 1.812759  | -5.010803 | -1.459183 |
| H 0 | 3.194183  | -6.063995 | 0.326126  |
| H 0 | -2.089462 | -4.233170 | -2.940460 |

TS1

|      |           |           |           |
|------|-----------|-----------|-----------|
| C 0  | 1.130341  | 5.147873  | -0.083557 |
| C 0  | 1.130341  | 6.686157  | -0.083557 |
| C 0  | -0.321396 | 4.627106  | -0.083557 |
| C 0  | 0.316132  | 7.256393  | 1.088196  |
| C 0  | -1.139267 | 5.166687  | 1.107605  |
| C 0  | -1.118164 | 6.704880  | 1.096115  |
| N 0  | -0.327454 | 3.181885  | -0.074783 |
| C 0  | -0.317642 | 2.024017  | -0.051956 |
| Au 0 | -0.307281 | -0.012894 | -0.048141 |
| C 0  | -0.906158 | -7.283707 | 0.243103  |
| C 0  | -0.671585 | -6.818909 | -1.054382 |
| C 0  | -0.574890 | -5.449509 | -1.301453 |
| C 0  | -0.713043 | -4.530487 | -0.243271 |
| C 0  | -0.957397 | -5.005829 | 1.059937  |
| C 0  | -1.047302 | -6.374893 | 1.298798  |
| C 0  | -0.597916 | -3.093811 | -0.490067 |
| C 0  | -0.213211 | -2.080383 | 0.301498  |
| O 0  | -0.868622 | -2.629150 | -1.799591 |
| H 0  | 1.638885  | 4.771149  | 0.813797  |
| H 0  | 1.665482  | 4.756378  | -0.956192 |
| H 0  | 0.716309  | 7.050354  | -1.034912 |
| H 0  | 2.166733  | 7.039703  | -0.041016 |
| H 0  | -0.813217 | 4.909180  | -1.023422 |
| H 0  | 0.294891  | 8.350616  | 1.030777  |
| H 0  | 0.811768  | 7.002075  | 2.036362  |
| H 0  | -0.695450 | 4.790604  | 2.038971  |
| H 0  | -2.166748 | 4.788986  | 1.054443  |
| H 0  | -1.659821 | 7.069504  | 0.211365  |
| H 0  | -1.667847 | 7.072617  | 1.969910  |
| H 0  | -0.525803 | -1.322556 | -1.168488 |
| H 0  | -0.981857 | -8.350632 | 0.432205  |
| H 0  | -0.556091 | -7.522507 | -1.873581 |
| H 0  | -0.359177 | -5.095398 | -2.305267 |
| H 0  | -1.098800 | -4.302307 | 1.875549  |
| H 0  | -1.239990 | -6.734528 | 2.305283  |

|     |           |           |           |
|-----|-----------|-----------|-----------|
| H 0 | 0.264923  | -2.229843 | 1.266693  |
| H 0 | -1.755020 | -2.894791 | -2.120285 |

Int1

|      |           |           |           |
|------|-----------|-----------|-----------|
| C 0  | 1.472656  | 2.960434  | -2.545532 |
| C 0  | 1.472656  | 4.498886  | -2.545532 |
| C 0  | 0.022293  | 2.437286  | -2.545532 |
| C 0  | 0.658218  | 5.069534  | -1.374237 |
| C 0  | -0.796051 | 2.981079  | -1.357193 |
| C 0  | -0.776276 | 4.518967  | -1.367355 |
| N 0  | 0.013046  | 0.993011  | -2.529053 |
| C 0  | -0.000137 | -0.166504 | -2.499756 |
| Au 0 | -0.052032 | -2.162064 | -2.472580 |
| C 0  | -0.532837 | -5.590698 | 2.523941  |
| C 0  | 0.793823  | -5.793808 | 2.127350  |
| C 0  | 1.178650  | -5.524673 | 0.817734  |
| C 0  | 0.231995  | -5.047333 | -0.117142 |
| C 0  | -1.104187 | -4.846252 | 0.295883  |
| C 0  | -1.479706 | -5.116257 | 1.606430  |
| C 0  | 0.639816  | -4.790482 | -1.492050 |
| C 0  | -0.194885 | -4.309784 | -2.545990 |
| O 0  | 1.921707  | -5.038315 | -1.725250 |
| H 0  | 1.982529  | 2.583725  | -1.648743 |
| H 0  | 2.008011  | 2.569229  | -3.418289 |
| H 0  | 1.057724  | 4.863388  | -3.496400 |
| H 0  | 2.508713  | 4.853775  | -2.503265 |
| H 0  | -0.467500 | 2.719528  | -3.486359 |
| H 0  | 0.638489  | 6.163956  | -1.430893 |
| H 0  | 1.152817  | 4.813721  | -0.425797 |
| H 0  | -0.353836 | 2.604874  | -0.424957 |
| H 0  | -1.823364 | 2.602798  | -1.411072 |
| H 0  | -1.316803 | 4.884827  | -2.252335 |
| H 0  | -1.326279 | 4.887329  | -0.493820 |
| H 0  | -0.831085 | -5.803421 | 3.546677  |
| H 0  | 1.525574  | -6.163956 | 2.838867  |
| H 0  | 2.205536  | -5.685898 | 0.510696  |
| H 0  | -1.849304 | -4.476212 | -0.399918 |
| H 0  | -2.508713 | -4.961090 | 1.915924  |
| H 0  | 0.152695  | -4.583649 | -3.546677 |
| H 0  | -1.257202 | -4.515594 | -2.423600 |
| H 0  | 2.157364  | -4.884247 | -2.658020 |

TS2

|     |          |           |           |
|-----|----------|-----------|-----------|
| C 0 | 0.955338 | -5.240234 | -0.932037 |
|-----|----------|-----------|-----------|

|       |           |           |           |
|-------|-----------|-----------|-----------|
| C 0   | 0.840347  | -6.729752 | -1.299194 |
| C 0   | -0.430862 | -4.695511 | -0.529922 |
| C 0   | -0.209763 | -6.967987 | -2.395203 |
| C 0   | -1.486618 | -4.900833 | -1.635162 |
| C 0   | -1.577820 | -6.393570 | -1.995651 |
| N 0   | -0.330902 | -3.291855 | -0.198227 |
| C 0   | -0.244720 | -2.163834 | 0.047974  |
| Au 0  | -0.072357 | -0.216263 | 0.482651  |
| C 0   | 0.405396  | 7.032379  | 2.161560  |
| C 0   | 1.658691  | 6.506042  | 1.819611  |
| C 0   | 1.777832  | 5.165253  | 1.472153  |
| C 0   | 0.633972  | 4.337387  | 1.464966  |
| C 0   | -0.623734 | 4.875214  | 1.810379  |
| C 0   | -0.734192 | 6.218719  | 2.157013  |
| C 0   | 0.783279  | 2.937637  | 1.099411  |
| C 0   | -0.354416 | 1.934387  | 1.048538  |
| O 0   | 1.872574  | 2.407272  | 0.785568  |
| H 0   | 1.322998  | -4.666916 | -1.793365 |
| H 0   | 1.664825  | -5.093475 | -0.109726 |
| H 0   | 0.576660  | -7.307434 | -0.401535 |
| H 0   | 1.823547  | -7.090256 | -1.622238 |
| H 0   | -0.764053 | -5.186035 | 0.393539  |
| H 0   | -0.300200 | -8.040985 | -2.599030 |
| H 0   | 0.124924  | -6.498184 | -3.331451 |
| H 0   | -1.190903 | -4.317245 | -2.517090 |
| H 0   | -2.457321 | -4.520554 | -1.296814 |
| H 0   | -1.977890 | -6.952316 | -1.137300 |
| H 0   | -2.300659 | -6.516830 | -2.810104 |
| H 0   | 0.945679  | 1.260773  | 0.664780  |
| H 0   | 0.316864  | 8.080719  | 2.432678  |
| H 0   | 2.537048  | 7.144302  | 1.825974  |
| H 0   | 2.740707  | 4.741928  | 1.205353  |
| H 0   | -1.510742 | 4.248138  | 1.808640  |
| H 0   | -1.701782 | 6.633240  | 2.422897  |
| H 0   | -0.823593 | 1.785080  | 2.027023  |
| H 0   | -1.113846 | 2.202393  | 0.306000  |
| Int1' |           |           |           |
| C 0   | -0.526718 | 3.232773  | 0.381622  |
| C 0   | -0.526718 | 4.771164  | 0.381622  |
| C 0   | -1.978912 | 2.713730  | 0.381622  |
| C 0   | -1.339996 | 5.341827  | 1.553772  |
| C 0   | -2.796555 | 3.253891  | 1.572388  |
| C 0   | -2.774780 | 4.791672  | 1.562302  |

|      |           |           |           |
|------|-----------|-----------|-----------|
| N 0  | -1.991562 | 1.267334  | 0.394028  |
| C 0  | -2.005325 | 0.109665  | 0.422852  |
| Au 0 | -2.047333 | -1.827866 | 0.447159  |
| C 0  | 2.761749  | -3.855743 | -0.382614 |
| C 0  | 2.027985  | -3.771561 | 0.804550  |
| C 0  | 0.663971  | -4.067581 | 0.808884  |
| C 0  | 0.019791  | -4.451660 | -0.383453 |
| C 0  | 0.763184  | -4.524231 | -1.575531 |
| C 0  | 2.126938  | -4.233566 | -1.570892 |
| C 0  | -1.408432 | -4.800476 | -0.389969 |
| C 0  | -2.045456 | -5.742416 | -1.086105 |
| O 0  | -2.157500 | -3.974960 | 0.514908  |
| H 0  | -0.017502 | 2.855820  | 1.278580  |
| H 0  | 0.007874  | 2.841537  | -0.491516 |
| H 0  | -0.941422 | 5.135712  | -0.569366 |
| H 0  | 0.509811  | 5.124496  | 0.423355  |
| H 0  | -2.469467 | 2.995438  | -0.558945 |
| H 0  | -1.359879 | 6.436081  | 1.496567  |
| H 0  | -0.844208 | 5.086777  | 2.501770  |
| H 0  | -2.353668 | 2.876129  | 2.503616  |
| H 0  | -3.824402 | 2.877258  | 1.518387  |
| H 0  | -3.317230 | 5.158188  | 0.678787  |
| H 0  | -3.323181 | 5.158905  | 2.437134  |
| H 0  | 3.824417  | -3.630554 | -0.382156 |
| H 0  | 2.520508  | -3.491760 | 1.731476  |
| H 0  | 0.108673  | -4.038589 | 1.742004  |
| H 0  | 0.267929  | -4.794830 | -2.503632 |
| H 0  | 2.692810  | -4.294128 | -2.496017 |
| H 0  | -3.124680 | -5.868073 | -1.057083 |
| H 0  | -1.483154 | -6.436096 | -1.699890 |
| H 0  | -3.041367 | -4.353775 | 0.669174  |

TS2'

|      |           |           |           |
|------|-----------|-----------|-----------|
| C 0  | -0.473480 | -3.036500 | 1.533783  |
| C 0  | -0.455475 | -4.323608 | 2.375977  |
| C 0  | -1.926010 | -2.549194 | 1.358200  |
| C 0  | -1.356400 | -5.412567 | 1.772934  |
| C 0  | -2.832275 | -3.623260 | 0.723541  |
| C 0  | -2.792984 | -4.905197 | 1.572098  |
| N 0  | -1.955597 | -1.345657 | 0.558000  |
| C 0  | -1.986786 | -0.390991 | -0.098251 |
| Au 0 | -2.046570 | 1.225372  | -1.174515 |
| C 0  | 2.691208  | 4.405228  | -2.271469 |
| C 0  | 2.061951  | 3.264236  | -2.786789 |

|     |           |           |           |
|-----|-----------|-----------|-----------|
| C 0 | 0.673782  | 3.174713  | -2.779541 |
| C 0 | -0.097458 | 4.229507  | -2.239822 |
| C 0 | 0.547668  | 5.379074  | -1.728424 |
| C 0 | 1.935333  | 5.462158  | -1.746063 |
| C 0 | -1.534271 | 4.158356  | -2.213303 |
| C 0 | -2.533051 | 5.131241  | -2.228333 |
| O 0 | -2.181534 | 2.954422  | -2.371918 |
| H 0 | -0.044144 | -3.229324 | 0.541534  |
| H 0 | 0.127213  | -2.251129 | 2.006958  |
| H 0 | -0.786300 | -4.094193 | 3.399338  |
| H 0 | 0.577927  | -4.679535 | 2.456894  |
| H 0 | -2.333969 | -2.255356 | 2.333923  |
| H 0 | -1.359161 | -6.296219 | 2.421265  |
| H 0 | -0.943359 | -5.734924 | 0.805893  |
| H 0 | -2.471924 | -3.831833 | -0.292694 |
| H 0 | -3.856262 | -3.241791 | 0.638794  |
| H 0 | -3.256363 | -4.709579 | 2.550003  |
| H 0 | -3.407547 | -5.671158 | 1.085693  |
| H 0 | 3.775300  | 4.475189  | -2.286972 |
| H 0 | 2.655807  | 2.459778  | -3.209991 |
| H 0 | 0.177139  | 2.316620  | -3.221222 |
| H 0 | -0.045944 | 6.183258  | -1.304047 |
| H 0 | 2.431778  | 6.342529  | -1.349548 |
| H 0 | -3.337250 | 5.029495  | -1.493210 |
| H 0 | -2.351578 | 6.145096  | -2.572952 |
| H 0 | -3.065094 | 3.816025  | -2.708420 |

Int1'-W

|      |           |           |           |
|------|-----------|-----------|-----------|
| C 0  | 2.664642  | -0.752060 | 3.377975  |
| C 0  | 2.636169  | -1.584671 | 4.671448  |
| C 0  | 1.224182  | -0.429169 | 2.932434  |
| C 0  | 1.786560  | -2.855042 | 4.513931  |
| C 0  | 0.370605  | -1.699173 | 2.742279  |
| C 0  | 0.362854  | -2.522049 | 4.041870  |
| N 0  | 1.244598  | 0.337341  | 1.707123  |
| C 0  | 1.263900  | 0.930191  | 0.711639  |
| Au 0 | 1.280396  | 1.925369  | -0.950333 |
| C 0  | -1.908875 | -0.374283 | -4.479263 |
| C 0  | -0.514404 | -0.387344 | -4.380219 |
| C 0  | 0.178467  | 0.784409  | -4.070236 |
| C 0  | -0.521042 | 1.987564  | -3.856308 |
| C 0  | -1.924454 | 1.988739  | -3.948013 |
| C 0  | -2.611084 | 0.816238  | -4.262878 |
| C 0  | 0.201859  | 3.238266  | -3.563416 |

|     |           |           |           |
|-----|-----------|-----------|-----------|
| C 0 | -0.100098 | 4.474411  | -3.969330 |
| O 0 | 1.358704  | 3.019730  | -2.767990 |
| H 0 | 3.162537  | -1.315598 | 2.577591  |
| H 0 | 3.225281  | 0.178314  | 3.524277  |
| H 0 | 2.235153  | -0.971039 | 5.491165  |
| H 0 | 3.664642  | -1.840698 | 4.950348  |
| H 0 | 0.748840  | 0.225220  | 3.674362  |
| H 0 | 1.747711  | -3.398666 | 5.464798  |
| H 0 | 2.265076  | -3.528061 | 3.787567  |
| H 0 | 0.800354  | -2.292023 | 1.923798  |
| H 0 | -0.648163 | -1.421051 | 2.448990  |
| H 0 | -0.165344 | -1.960617 | 4.826157  |
| H 0 | -0.212967 | -3.439728 | 3.876358  |
| H 0 | -2.446075 | -1.285965 | -4.725113 |
| H 0 | 0.036362  | -1.306580 | -4.559418 |
| H 0 | 1.263870  | 0.774429  | -4.029419 |
| H 0 | -2.475433 | 2.905167  | -3.756805 |
| H 0 | -3.695206 | 0.829758  | -4.330872 |
| H 0 | 0.471436  | 5.343811  | -3.661316 |
| H 0 | -0.926559 | 4.633911  | -4.651596 |
| H 0 | 1.989456  | 3.792404  | -2.782410 |
| O 0 | 3.233154  | 4.925873  | -2.746475 |
| H 0 | 3.853928  | 5.019897  | -3.487259 |
| H 0 | 3.280411  | 5.749863  | -2.235855 |

TS2'-W

|      |           |           |           |
|------|-----------|-----------|-----------|
| C 0  | 2.716064  | -1.867600 | 3.037628  |
| C 0  | 3.803970  | -2.949997 | 3.146225  |
| C 0  | 1.883347  | -2.088364 | 1.758865  |
| C 0  | 4.686752  | -3.000168 | 1.889740  |
| C 0  | 2.756638  | -2.112564 | 0.488190  |
| C 0  | 3.843552  | -3.192856 | 0.619888  |
| N 0  | 0.872925  | -1.062347 | 1.640793  |
| C 0  | 0.081726  | -0.221008 | 1.536133  |
| Au 0 | -1.237915 | 1.185181  | 1.338943  |
| C 0  | -1.441269 | 2.730957  | -3.661362 |
| C 0  | -0.590500 | 2.910690  | -2.566879 |
| C 0  | -1.120667 | 3.125458  | -1.293167 |
| C 0  | -2.513290 | 3.174927  | -1.104721 |
| C 0  | -3.362015 | 3.016296  | -2.213196 |
| C 0  | -2.826965 | 2.783783  | -3.481232 |
| C 0  | -3.073517 | 3.447693  | 0.243179  |
| C 0  | -4.049973 | 4.400970  | 0.461060  |
| O 0  | -2.691498 | 2.681686  | 1.275360  |

|     |           |           |           |
|-----|-----------|-----------|-----------|
| H 0 | 3.177612  | -0.872253 | 2.989304  |
| H 0 | 2.059540  | -1.883713 | 3.915115  |
| H 0 | 3.329391  | -3.929489 | 3.303528  |
| H 0 | 4.411774  | -2.753510 | 4.036743  |
| H 0 | 1.330048  | -3.032715 | 1.840988  |
| H 0 | 5.418793  | -3.810959 | 1.979263  |
| H 0 | 5.261948  | -2.066223 | 1.808853  |
| H 0 | 3.221115  | -1.125229 | 0.362778  |
| H 0 | 2.127579  | -2.295395 | -0.390594 |
| H 0 | 3.371170  | -4.185867 | 0.636658  |
| H 0 | 4.479172  | -3.167114 | -0.272598 |
| H 0 | -1.027222 | 2.561127  | -4.651062 |
| H 0 | 0.486954  | 2.899139  | -2.705597 |
| H 0 | -0.450241 | 3.309677  | -0.457352 |
| H 0 | -4.439621 | 3.060486  | -2.081619 |
| H 0 | -3.492752 | 2.647766  | -4.328674 |
| H 0 | -4.148788 | 4.836044  | 1.457047  |
| H 0 | -4.366287 | 5.031082  | -0.362015 |
| O 0 | -5.089905 | 2.509964  | 1.985748  |
| H 0 | -4.059494 | 2.351013  | 1.968796  |
| H 0 | -5.564316 | 1.707916  | 1.692032  |
| H 0 | -5.051666 | 3.268005  | 1.185867  |

Pro

|      |           |           |           |
|------|-----------|-----------|-----------|
| C 0  | 1.129837  | 3.533783  | 1.742310  |
| C 0  | 1.129837  | 5.072021  | 1.742310  |
| C 0  | -0.321274 | 3.011627  | 1.742310  |
| C 0  | 0.316040  | 5.642014  | 2.914398  |
| C 0  | -1.138779 | 3.552979  | 2.932709  |
| C 0  | -1.118317 | 5.090942  | 2.921829  |
| N 0  | -0.326111 | 1.566177  | 1.758270  |
| C 0  | -0.321533 | 0.408203  | 1.803268  |
| Au 0 | -0.319504 | -1.527863 | 1.886124  |
| C 0  | -0.322922 | -4.698227 | -2.778717 |
| C 0  | 0.346756  | -3.693039 | -2.070251 |
| C 0  | 0.283707  | -3.661331 | -0.680573 |
| C 0  | -0.440582 | -4.645615 | 0.024200  |
| C 0  | -1.083755 | -5.672195 | -0.700653 |
| C 0  | -1.038589 | -5.685394 | -2.092468 |
| C 0  | -0.508759 | -4.632431 | 1.491821  |
| C 0  | -0.777283 | -5.899323 | 2.258011  |
| O 0  | -0.350510 | -3.597015 | 2.187424  |
| H 0  | 1.639145  | 3.157013  | 2.639328  |



|     |           |           |           |
|-----|-----------|-----------|-----------|
| H 0 | 1.665390  | 3.142563  | 0.869629  |
| H 0 | 0.714615  | 5.436539  | 0.791519  |
| H 0 | 2.166153  | 5.426102  | 1.784409  |
| H 0 | -0.812256 | 3.291931  | 0.801590  |
| H 0 | 0.295731  | 6.736374  | 2.857849  |
| H 0 | 0.811234  | 5.386673  | 3.862595  |
| H 0 | -0.694885 | 3.176407  | 3.863876  |
| H 0 | -2.166153 | 3.174911  | 2.880066  |
| H 0 | -1.659882 | 5.456482  | 2.037277  |
| H 0 | -1.667969 | 5.458572  | 3.795746  |
| H 0 | -0.277069 | -4.718124 | -3.863876 |
| H 0 | 0.925797  | -2.944458 | -2.602768 |
| H 0 | 0.837616  | -2.899307 | -0.140259 |
| H 0 | -1.640839 | -6.445190 | -0.181473 |
| H 0 | -1.554703 | -6.466827 | -2.641830 |
| H 0 | -1.837585 | -6.169708 | 2.159775  |
| H 0 | -0.186111 | -6.736389 | 1.875244  |
| H 0 | -0.565140 | -5.737305 | 3.316162  |

Rea''

|    |             |             |             |
|----|-------------|-------------|-------------|
| C  | -4.96137000 | 1.30719900  | 0.03519400  |
| C  | -6.49686000 | 1.31238700  | -0.03928400 |
| C  | -4.40801600 | -0.05335200 | -0.43315400 |
| C  | -7.10955300 | 0.14858000  | 0.75607100  |
| C  | -4.99894300 | -1.22259800 | 0.37925000  |
| C  | -6.53444000 | -1.20277000 | 0.30267200  |
| N  | -2.97510300 | -0.06102600 | -0.35244300 |
| C  | -1.81176000 | -0.06140300 | -0.27214700 |
| Au | 0.17370500  | -0.04740800 | -0.15138100 |
| C  | 7.62280100  | 0.08346600  | 0.26303400  |
| C  | 6.94898000  | -1.13449600 | 0.12028700  |
| C  | 5.55661200  | -1.16601900 | 0.04387400  |
| C  | 4.80454300  | 0.02675000  | 0.10895000  |
| C  | 5.49665400  | 1.24858400  | 0.25320900  |
| C  | 6.88915100  | 1.27312400  | 0.32900700  |
| C  | 3.37895500  | -0.00107700 | 0.03039200  |
| C  | 2.15487100  | -0.02270700 | -0.03734700 |
| H  | -4.63239400 | 1.48078900  | 1.06859200  |
| H  | -4.53650000 | 2.10881100  | -0.57993000 |
| H  | -6.81104700 | 1.24280000  | -1.09148600 |
| H  | -6.87296300 | 2.27268200  | 0.33372700  |
| H  | -4.65339900 | -0.19403000 | -1.49454400 |
| H  | -8.20086600 | 0.14971200  | 0.64436200  |
| H  | -6.90329000 | 0.29109700  | 1.82721800  |

|   |             |             |             |
|---|-------------|-------------|-------------|
| H | -4.67148300 | -1.12375900 | 1.42299600  |
| H | -4.60012600 | -2.17148500 | 0.00228700  |
| H | -6.85084000 | -1.40707600 | -0.73106900 |
| H | -6.93673100 | -2.01732000 | 0.91697700  |
| H | 8.70811500  | 0.10532200  | 0.32196000  |
| H | 7.51069700  | -2.06420900 | 0.06787500  |
| H | 5.03324400  | -2.11126700 | -0.06733600 |
| H | 4.92676200  | 2.17182900  | 0.30440500  |
| H | 7.40408700  | 2.22451200  | 0.44014400  |

TS1''

|    |             |             |             |
|----|-------------|-------------|-------------|
| C  | 5.20404900  | -0.74998300 | 0.37272100  |
| C  | 6.70348700  | -0.42258100 | 0.28305600  |
| C  | 4.38452600  | 0.27620700  | -0.43450400 |
| C  | 6.99976400  | 1.01736800  | 0.73198400  |
| C  | 4.65637600  | 1.72046300  | 0.03076000  |
| C  | 6.15890400  | 2.03406100  | -0.05660300 |
| N  | 2.98320300  | -0.02203700 | -0.34572000 |
| C  | 1.84592500  | -0.26555400 | -0.26449400 |
| Au | -0.10478200 | -0.63682400 | -0.13739000 |
| C  | -6.38857700 | 2.28008900  | 0.16644900  |
| C  | -5.09896100 | 2.63824300  | -0.24230400 |
| C  | -4.08408200 | 1.68351800  | -0.28846000 |
| C  | -4.34850400 | 0.34549000  | 0.07922000  |
| C  | -5.64685900 | -0.00834500 | 0.48827400  |
| C  | -6.65437400 | 0.95602000  | 0.53027700  |
| C  | -3.24820600 | -0.58059300 | 0.04245200  |
| C  | -2.06639800 | -1.05257600 | -0.01021200 |
| O  | -4.02821100 | -2.46542500 | 0.28291900  |
| H  | 4.87197100  | -0.71807200 | 1.41907600  |
| H  | 5.00063300  | -1.75982500 | -0.00188600 |
| H  | 7.04537000  | -0.56123400 | -0.75347100 |
| H  | 7.26621800  | -1.13888500 | 0.89367900  |
| H  | 4.64630100  | 0.18691700  | -1.49753900 |
| H  | 8.06757600  | 1.23742800  | 0.61068000  |
| H  | 6.77835800  | 1.11663400  | 1.80495900  |
| H  | 4.30862500  | 1.82531400  | 1.06727300  |
| H  | 4.07396400  | 2.42012000  | -0.57981100 |
| H  | 6.47175300  | 2.02967200  | -1.11136400 |
| H  | 6.33718500  | 3.05024600  | 0.31532600  |
| H  | -7.17854000 | 3.02618500  | 0.19805000  |
| H  | -4.88256000 | 3.66412000  | -0.53038300 |
| H  | -3.08339200 | 1.96041100  | -0.60725300 |
| H  | -5.82608000 | -1.03999300 | 0.76985200  |

|        |             |             |             |
|--------|-------------|-------------|-------------|
| H      | -7.65357100 | 0.66981800  | 0.84927000  |
| H      | -4.44792000 | -2.82006000 | -0.52343400 |
| H      | -2.67722500 | -2.19302700 | 0.11579100  |
| Int1'' |             |             |             |
| C      | 4.29022600  | 0.75755400  | 1.29864900  |
| C      | 5.78695600  | 1.10257800  | 1.35664600  |
| C      | 4.01008100  | -0.22718900 | 0.14596900  |
| C      | 6.29852700  | 1.64467800  | 0.01239800  |
| C      | 4.50215000  | 0.31977500  | -1.20884100 |
| C      | 5.99756400  | 0.66817000  | -1.13568300 |
| N      | 2.60969000  | -0.53215700 | 0.08294600  |
| C      | 1.46535200  | -0.75742200 | 0.03818300  |
| Au     | -0.50288400 | -1.12598800 | -0.01910000 |
| C      | -3.65084000 | 3.56747000  | -0.13044900 |
| C      | -2.67174700 | 2.86319700  | -0.83894000 |
| C      | -2.64438700 | 1.46794200  | -0.80739700 |
| C      | -3.58602300 | 0.74422200  | -0.05473000 |
| C      | -4.58162500 | 1.46306700  | 0.63308800  |
| C      | -4.60782100 | 2.85883100  | 0.60233400  |
| C      | -3.56525400 | -0.73840900 | 0.00636500  |
| C      | -2.48992700 | -1.55616800 | -0.03209800 |
| O      | -4.86262000 | -1.22591500 | 0.14070200  |
| H      | 3.69859400  | 1.66772100  | 1.13160700  |
| H      | 3.95154700  | 0.32058800  | 2.24514400  |
| H      | 6.35866600  | 0.20315700  | 1.63037300  |
| H      | 5.95838200  | 1.83390200  | 2.15581800  |
| H      | 4.52073100  | -1.17708700 | 0.35497000  |
| H      | 7.37698900  | 1.83755700  | 0.06988400  |
| H      | 5.81701500  | 2.61149300  | -0.19664400 |
| H      | 3.91761300  | 1.21612200  | -1.45668300 |
| H      | 4.31001900  | -0.41962200 | -1.99500600 |
| H      | 6.58121900  | -0.25385300 | -0.99454600 |
| H      | 6.31669400  | 1.09321400  | -2.09505900 |
| H      | -3.67482400 | 4.65421600  | -0.15936200 |
| H      | -1.93634600 | 3.40124100  | -1.43294700 |
| H      | -1.90063400 | 0.92774500  | -1.38452000 |
| H      | -5.32992900 | 0.91743000  | 1.19814600  |
| H      | -5.37999600 | 3.39360900  | 1.15061300  |
| H      | -4.81192500 | -2.18692000 | 0.26676300  |
| H      | -2.73227300 | -2.62480800 | 0.00117300  |
| TS2''  |             |             |             |
| C      | -4.28765400 | 1.35834500  | -0.81777600 |

|    |             |             |             |
|----|-------------|-------------|-------------|
| C  | -5.77630200 | 1.74132600  | -0.79430900 |
| C  | -4.08136400 | -0.03996500 | -0.20212100 |
| C  | -6.36269700 | 1.65551800  | 0.62378800  |
| C  | -4.64981600 | -0.12633900 | 1.22837500  |
| C  | -6.13628200 | 0.26577100  | 1.23972800  |
| N  | -2.68945100 | -0.38586700 | -0.20803000 |
| C  | -1.55229200 | -0.65205200 | -0.20258700 |
| Au | 0.40701600  | -1.08463000 | -0.22204300 |
| C  | 4.35616800  | 3.37761000  | 0.00595200  |
| C  | 3.28867400  | 2.84877500  | -0.72859200 |
| C  | 2.99665000  | 1.48664500  | -0.65529200 |
| C  | 3.76365400  | 0.63821900  | 0.16309800  |
| C  | 4.83103800  | 1.18092200  | 0.90400300  |
| C  | 5.12872000  | 2.54084400  | 0.81956000  |
| C  | 3.49575200  | -0.80835400 | 0.22951100  |
| C  | 2.37861100  | -1.58823900 | -0.19073500 |
| O  | 4.37545100  | -1.58000800 | 0.81678600  |
| H  | -3.70226100 | 2.08460000  | -0.23782800 |
| H  | -3.89594500 | 1.36981200  | -1.84151900 |
| H  | -6.33642800 | 1.07080900  | -1.46311100 |
| H  | -5.89591700 | 2.75376400  | -1.19884400 |
| H  | -4.58496600 | -0.78553300 | -0.83244100 |
| H  | -7.43463200 | 1.88822100  | 0.60275600  |
| H  | -5.88814100 | 2.41711100  | 1.26026200  |
| H  | -4.07566500 | 0.55241200  | 1.87338800  |
| H  | -4.50868200 | -1.14082300 | 1.61876700  |
| H  | -6.71571500 | -0.48230900 | 0.67821400  |
| H  | -6.50974100 | 0.23729100  | 2.27054600  |
| H  | 4.58523000  | 4.43886800  | -0.05524000 |
| H  | 2.69129400  | 3.49685100  | -1.36492000 |
| H  | 2.18305600  | 1.06267400  | -1.23516800 |
| H  | 5.41198500  | 0.52272600  | 1.54170400  |
| H  | 5.95612900  | 2.95109200  | 1.39294200  |
| H  | 2.67313400  | -2.32330200 | -0.95108000 |
| H  | 3.35835500  | -2.36149600 | 0.66928400  |
